# Supplementary material for: New 19-Oxygenated Steroids from the Soft Coral Nephthea chabrolii
Source: Mar Drugs. 2012 Jun 6;10(6):1288–96. doi: 10.3390/md10061288 (PMC3397439; doi:10.3390/md10061288)

## Supplementary Materials

### Table of Contents

|                                                                                                       |   |
|-------------------------------------------------------------------------------------------------------|---|
| <b>S1.</b> $^1\text{H}$ NMR spectrum (400 MHz) of Nebrosteroid N ( <b>1</b> ) in $\text{CDCl}_3$ .    | 2 |
| <b>S2.</b> $^{13}\text{C}$ NMR spectrum (100 MHz) of Nebrosteroid N ( <b>1</b> ) in $\text{CDCl}_3$ . | 3 |
| <b>S3.</b> $^1\text{H}$ NMR spectrum (500 MHz) of Nebrosteroid O ( <b>2</b> ) in $\text{CDCl}_3$ .    | 4 |
| <b>S4.</b> $^{13}\text{C}$ NMR spectrum (125 MHz) of Nebrosteroid O ( <b>2</b> ) in $\text{CDCl}_3$ . | 5 |
| <b>S5.</b> $^1\text{H}$ NMR spectrum (400 MHz) of Nebrosteroid P ( <b>3</b> ) in $\text{CDCl}_3$ .    | 6 |
| <b>S6.</b> $^{13}\text{C}$ NMR spectrum (100 MHz) of Nebrosteroid P ( <b>3</b> ) in $\text{CDCl}_3$ . | 7 |

# S1. $^1\text{H}$ NMR spectrum (400 MHz) of Nebrosteroid N (**1**) in $\text{CDCl}_3$ .

Archive directory:  
/home/duh/vnmrsys/data  
Sample directory:  
SST22-13-rG10-3-A6\_20101204\_01  
FidFile: data\_s2pul\_001  
Pulse Sequence: PROTON (s2pul)  
Solvent:  $\text{cdcl}_3$   
Data collected on: Dec 4 2010

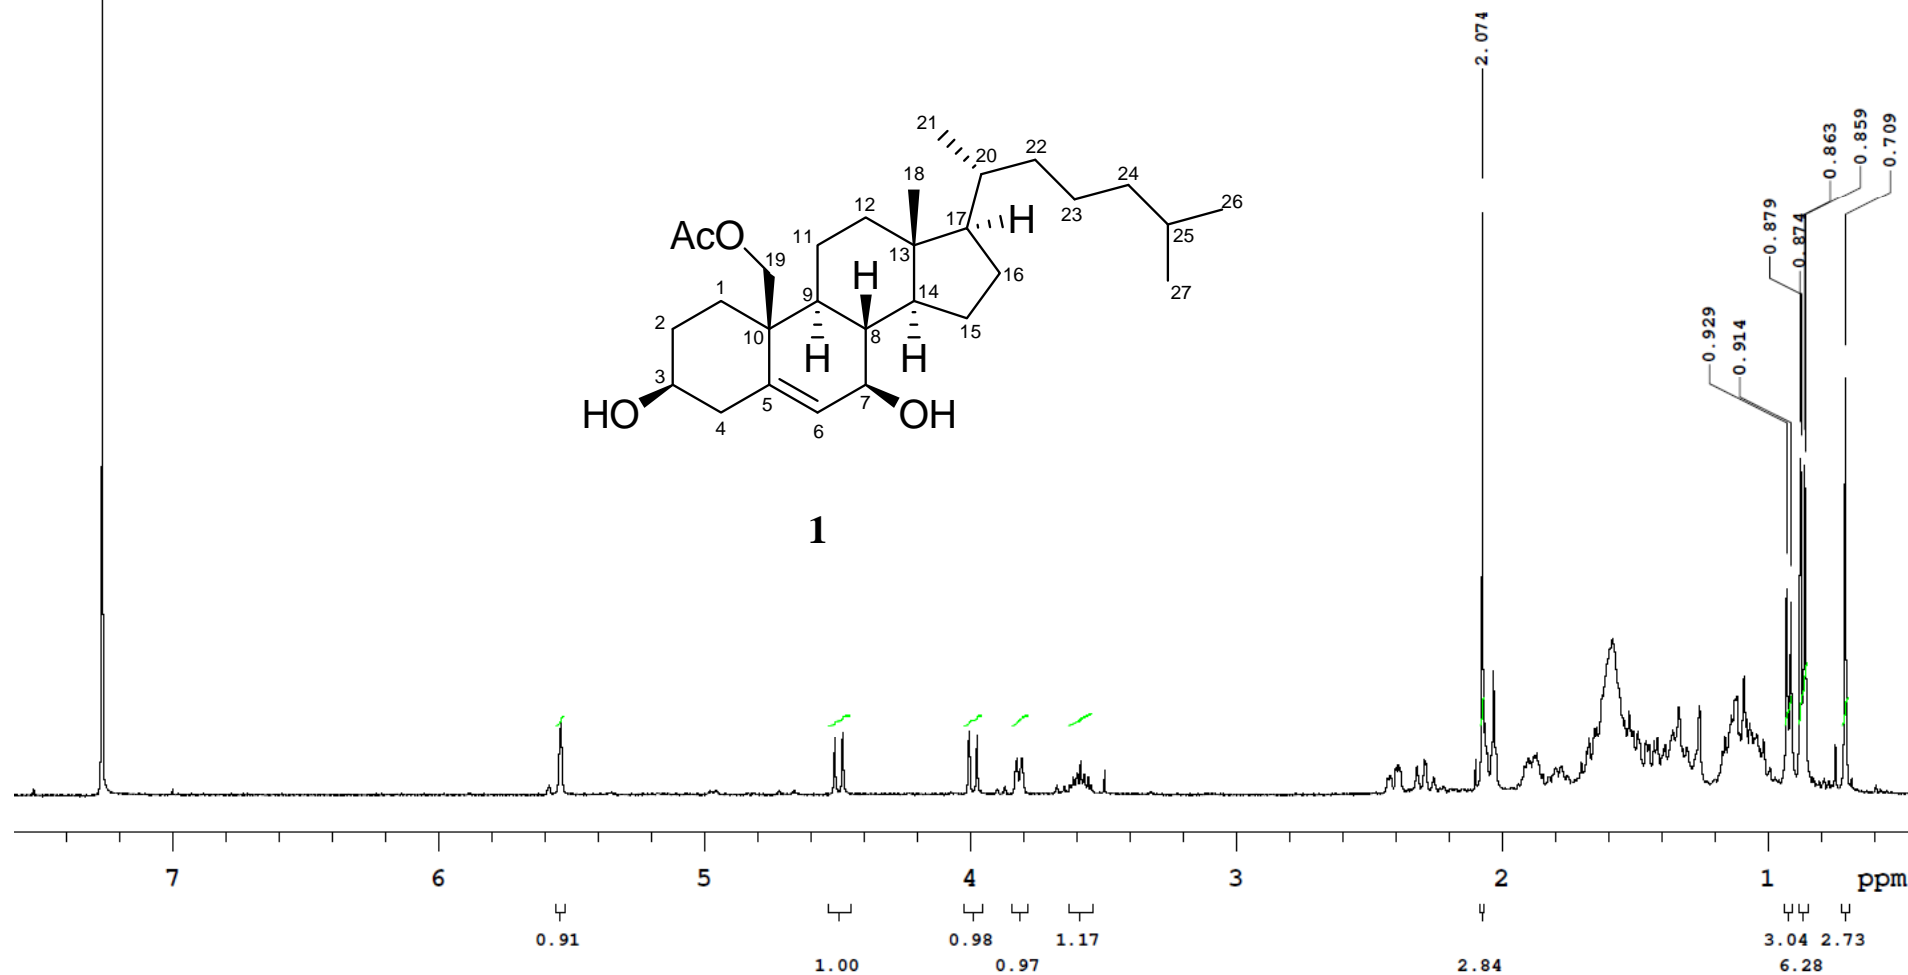

**S2.**  $^{13}\text{C}$  NMR spectrum (100 MHz) of Nebrosteroid N (1) in  $\text{CDCl}_3$ .

Archive directory:  
/home/duh/vnmrsys/data  
Sample directory:  
SST22-13-rG10-3-A6\_20101204\_01  
FidFile: data\_s2pul\_002

Pulse Sequence: CARBON (s2pul)  
Solvent:  $\text{cdcl}_3$   
Data collected on: Dec 5 2010

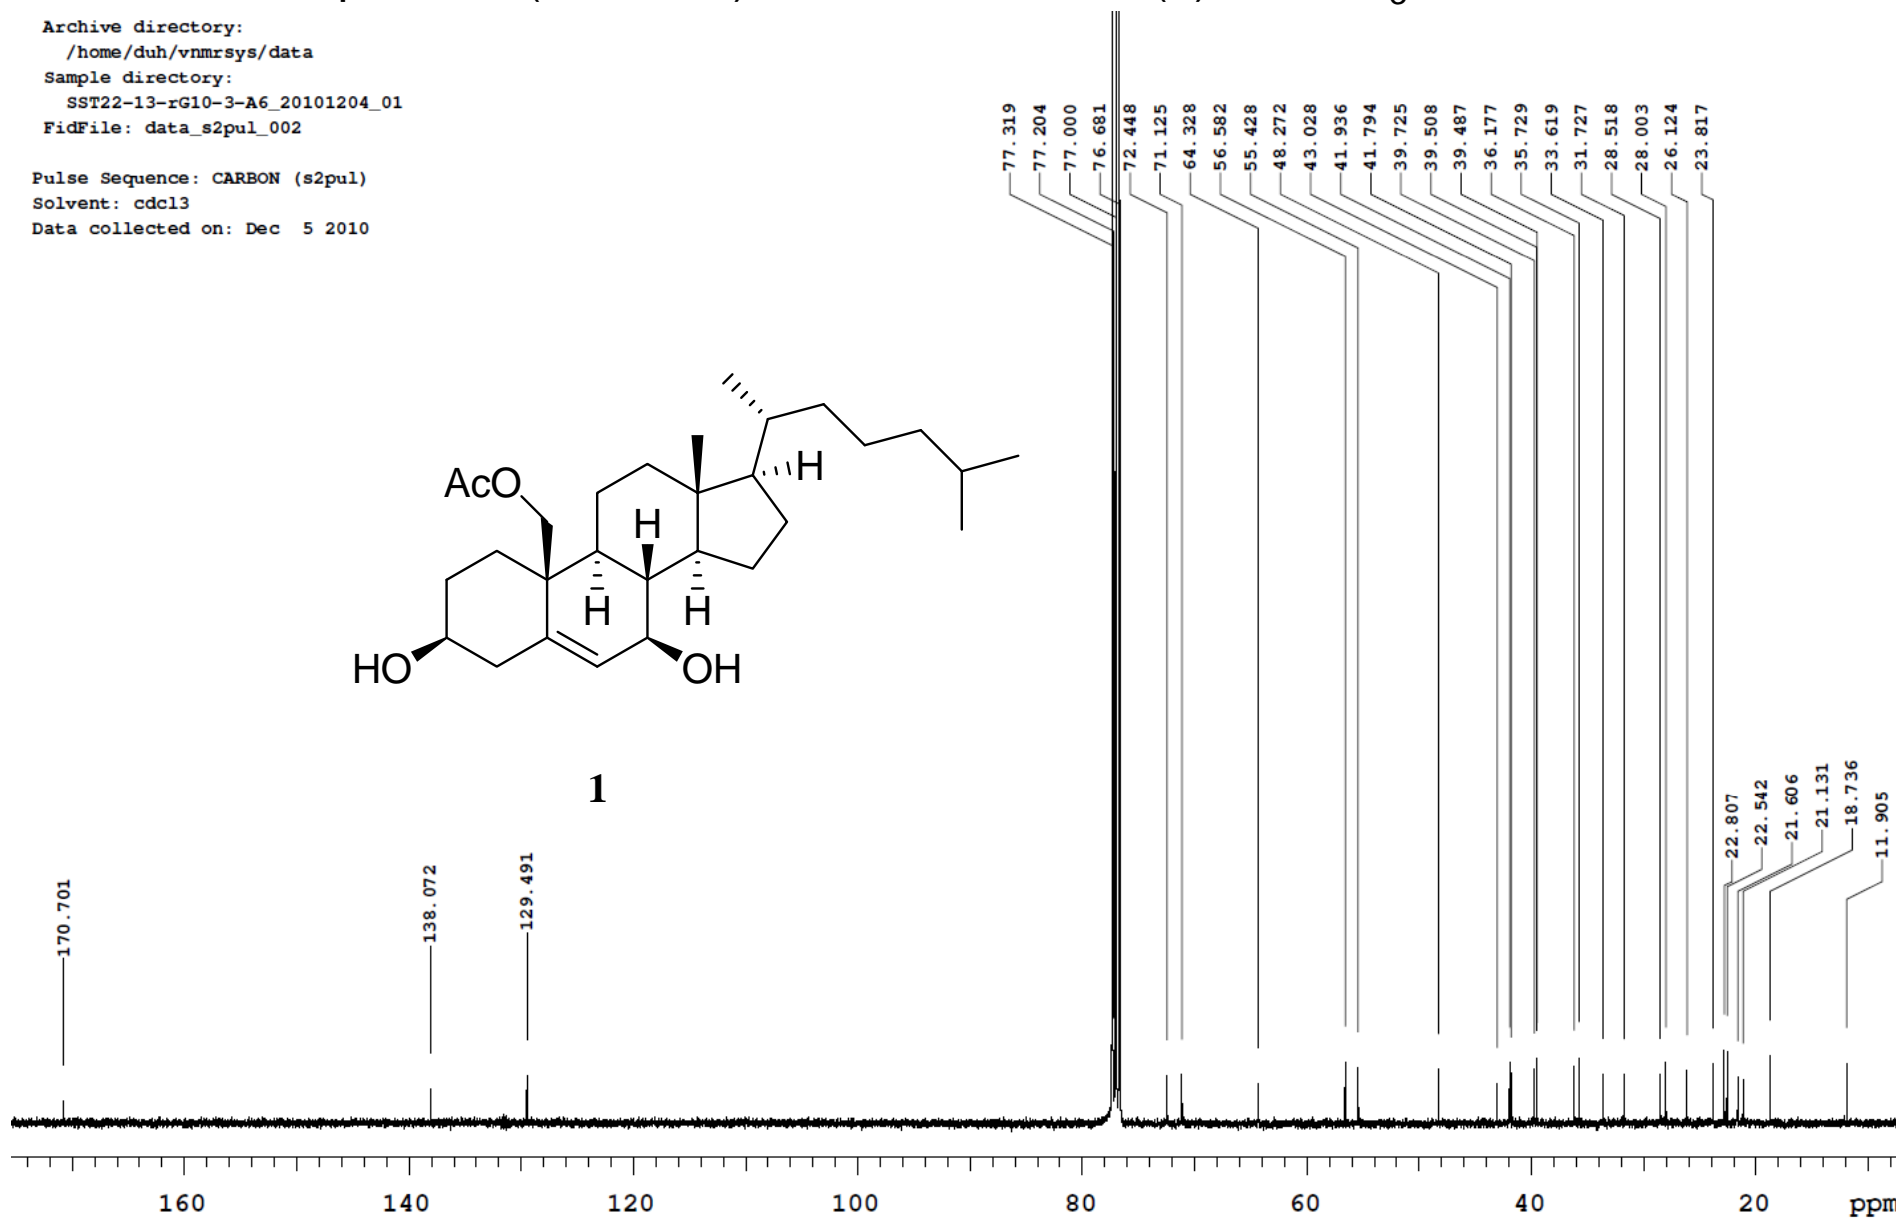

**S3.**  $^1\text{H}$  NMR spectrum (500 MHz) of Nebrosteroid O (**2**) in  $\text{CDCl}_3$ .

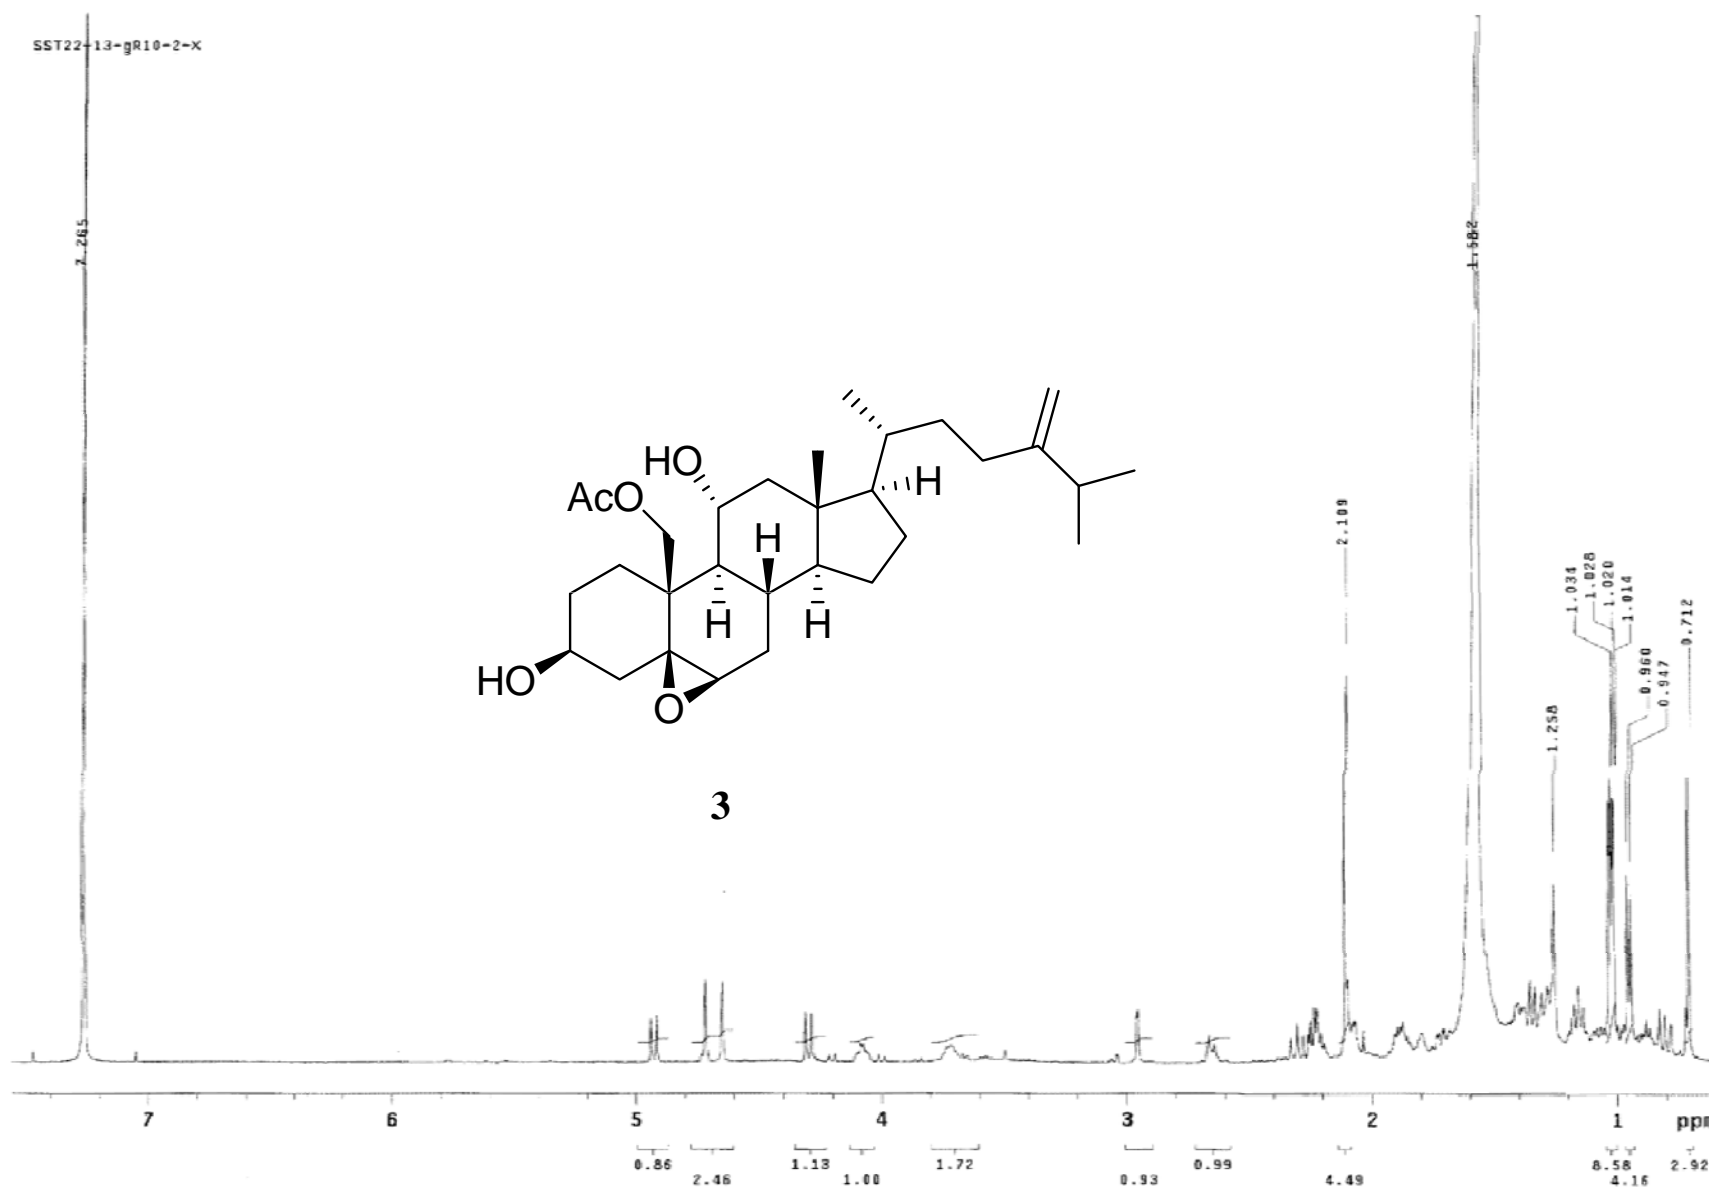

**S4.**  $^{13}\text{C}$  NMR spectrum (125 MHz) of Nebrosteroid O (**2**) in  $\text{CDCl}_3$ .

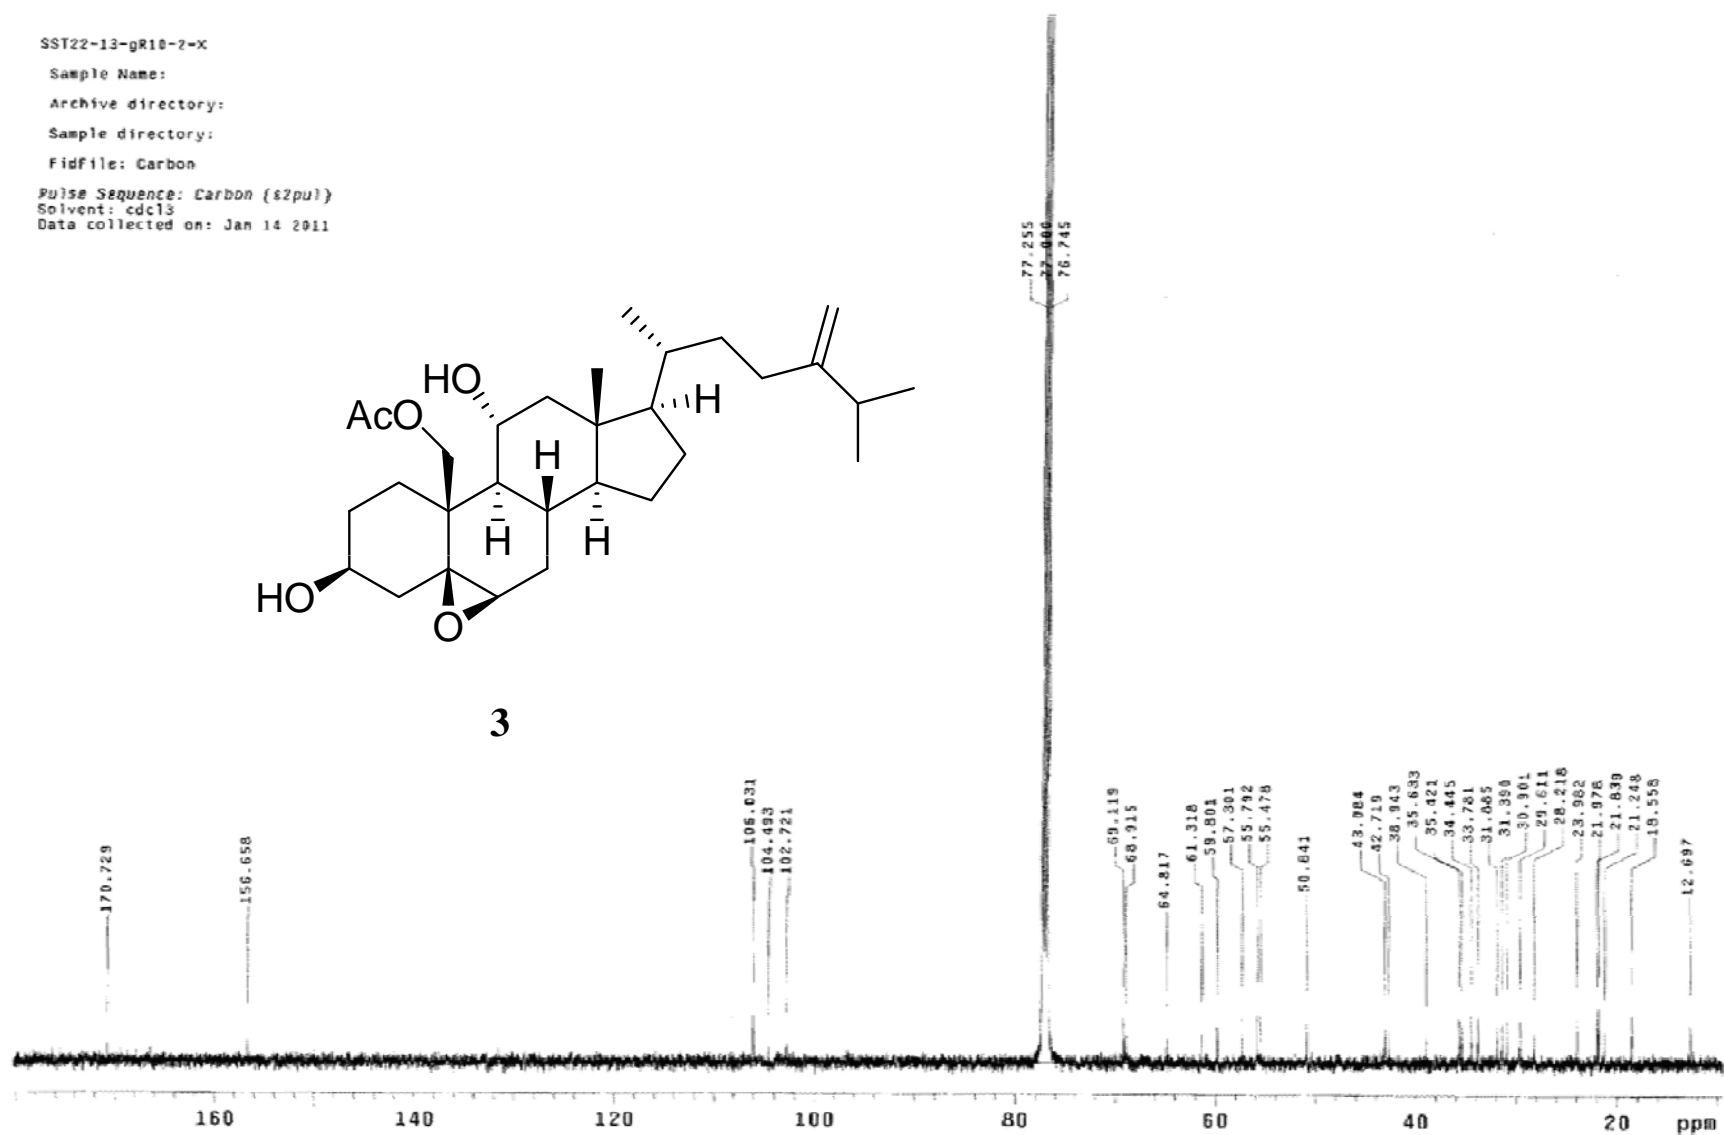

**S5.**  $^1\text{H}$  NMR spectrum (400 MHz) of Nebrosteroid P (**3**) in  $\text{CDCl}_3$ .

Archive directory:  
/home/duh/vnmrsys/data  
Sample directory:  
SST22-12-4-R5-L-3-S\_20110227\_02  
FidFile: data\_s2pul\_003  
Pulse Sequence: PROTON (s2pul)  
Solvent: cdcl3  
Data collected on: Feb 27 2011

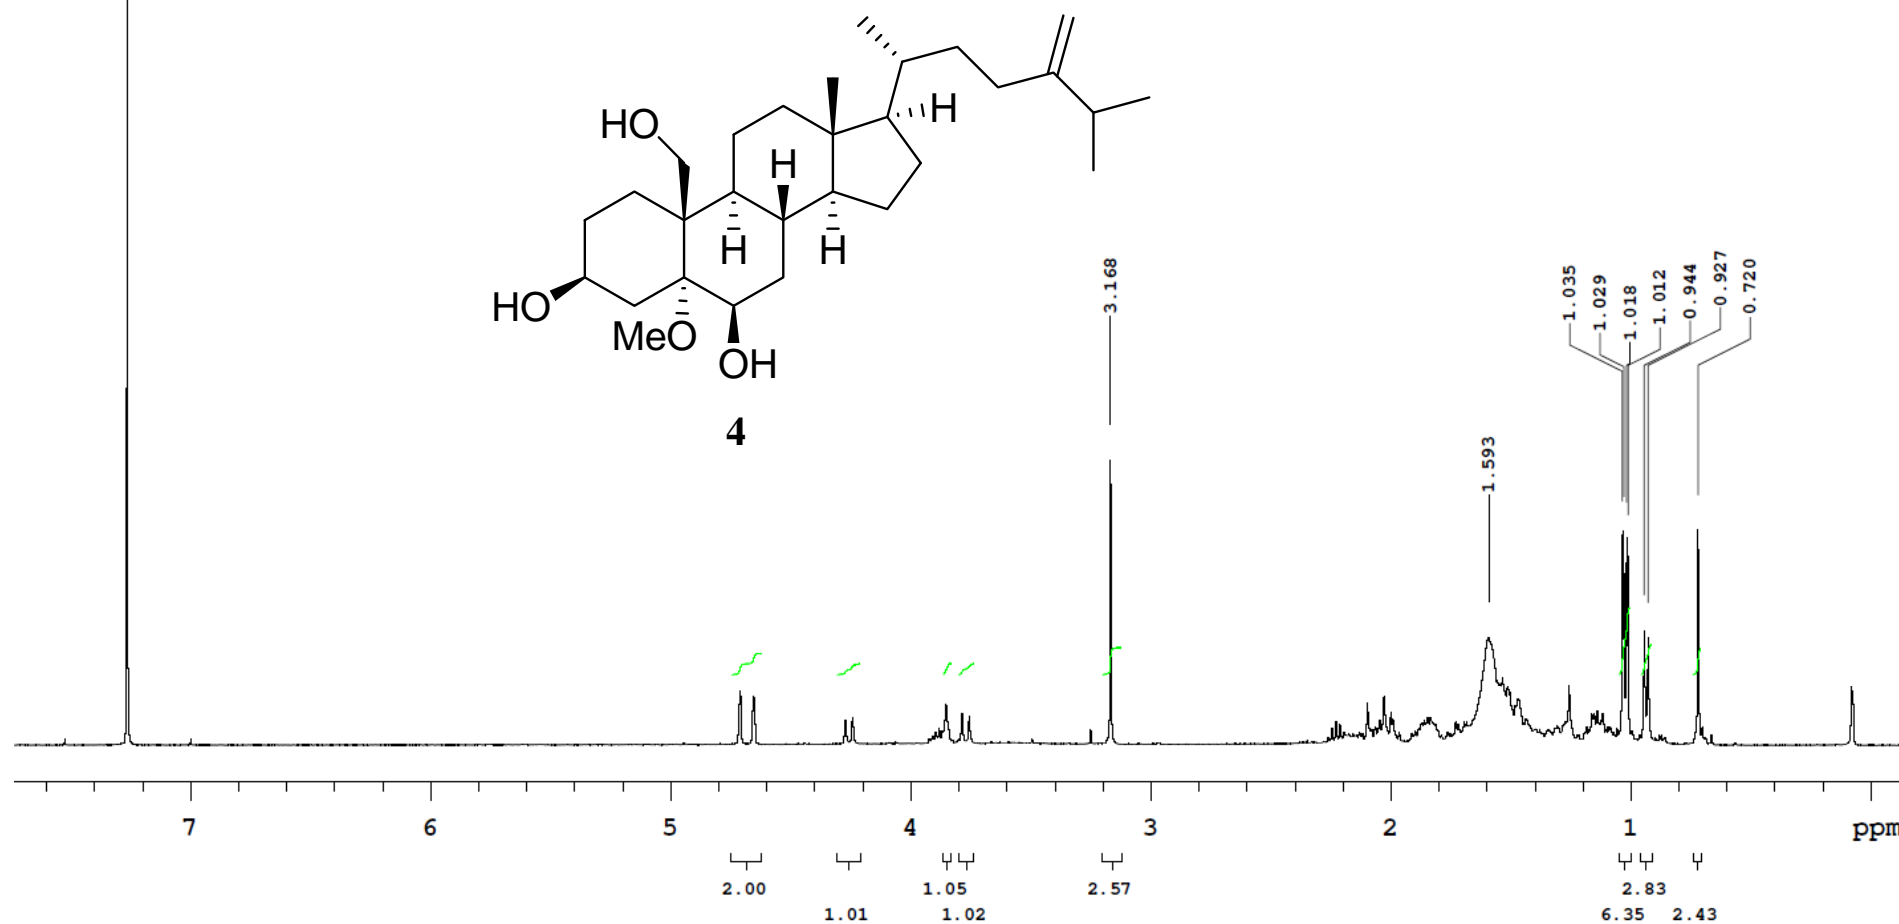

**S6.**  $^{13}\text{C}$  NMR spectrum (100 MHz) of Nebrosteroid P (**3**) in  $\text{CDCl}_3$ .

Archive directory:  
/home/duh/vnmrsys/data  
Sample directory:  
SST22-12-4-R5-L-3-S\_20110227\_02  
FidFile: data\_s2pul\_004

Pulse Sequence: CARBON (s2pul)  
Solvent:  $\text{cdcl}_3$   
Data collected on: Feb 28 2011

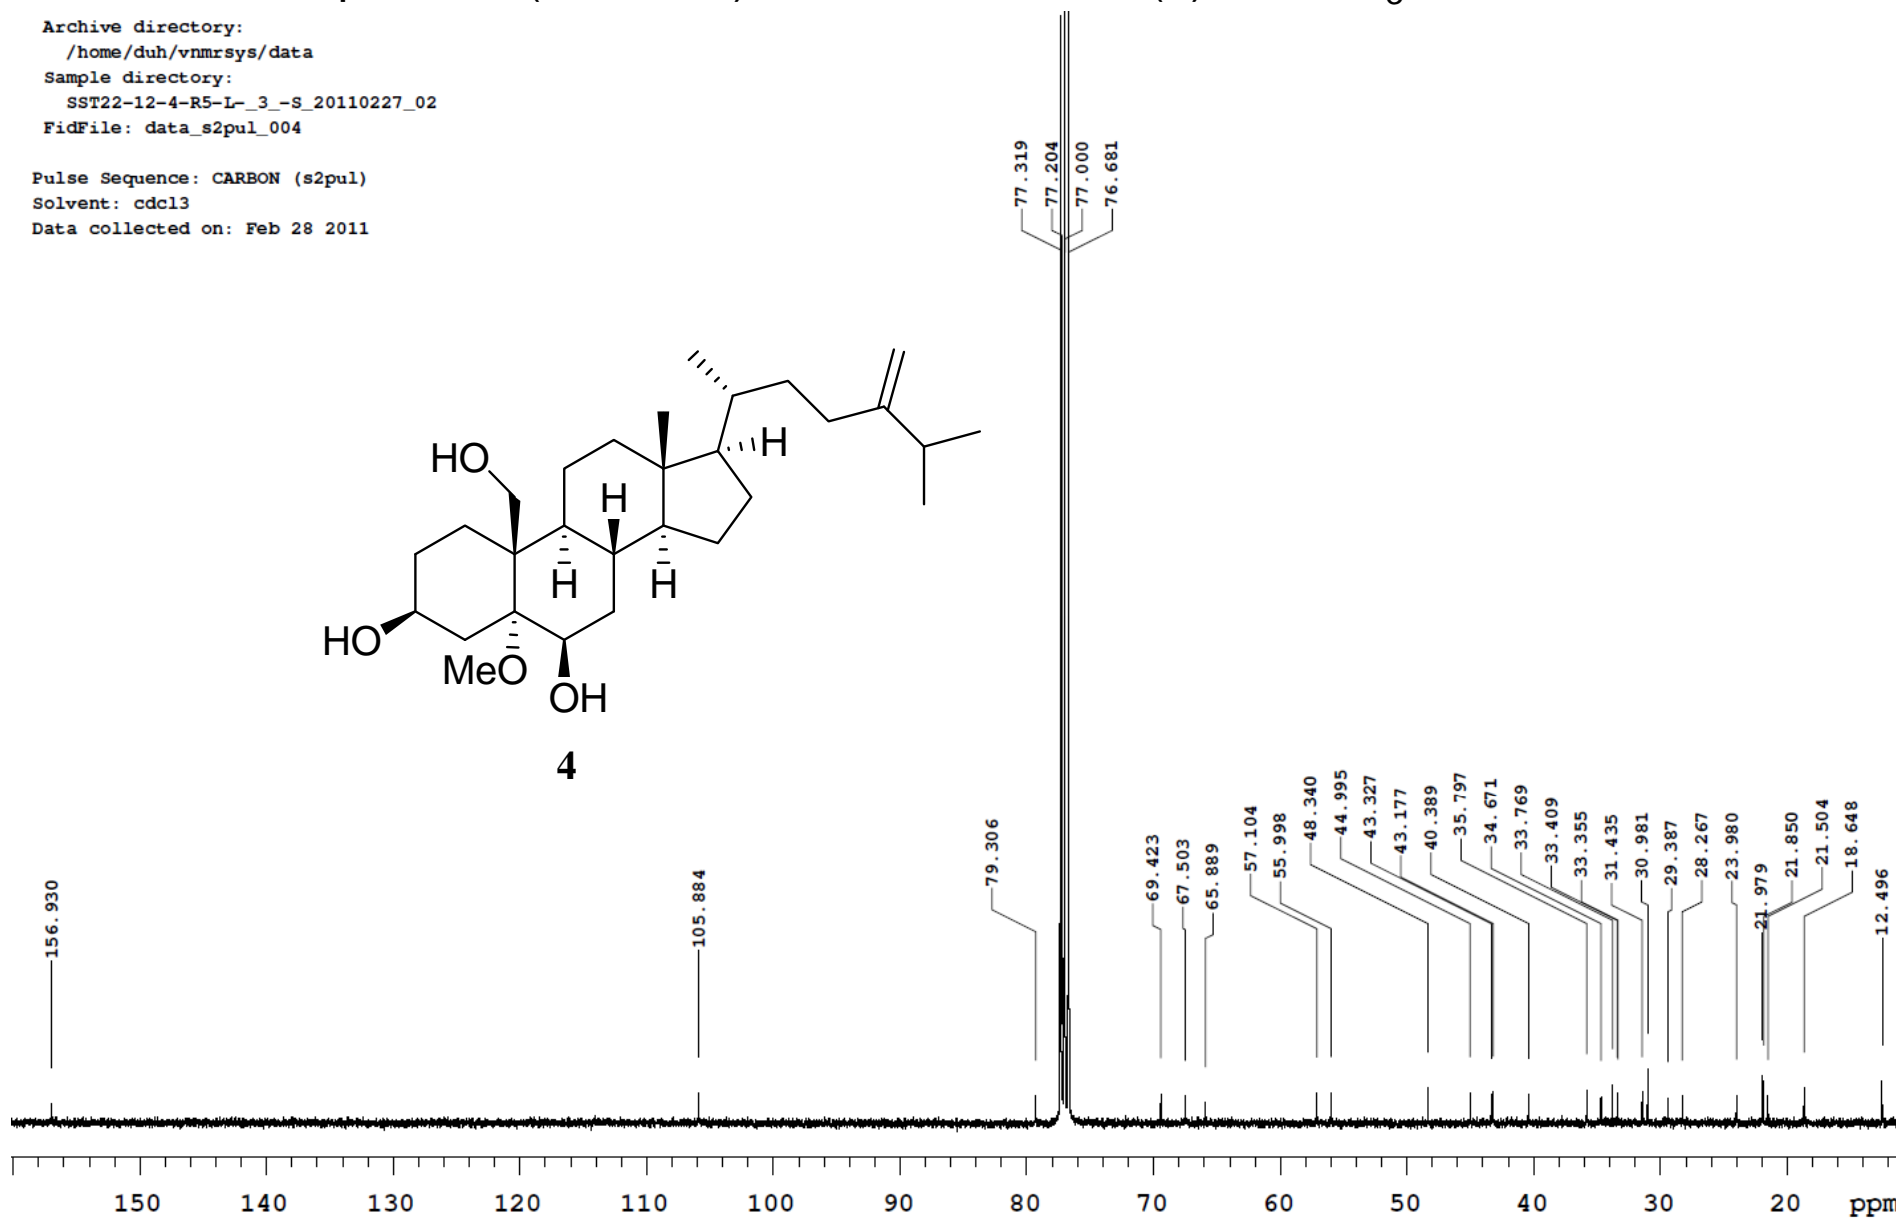

Supplement: Supplementary File 1: — PDF-Document (PDF, 979 KB) [file marinedrugs-10-01288-s001.pdf]
